# Supplementary material for: No aggregation-induced-emission but quenching of phosphorescence for an iridium complex with a 2,2-diphenylvinyl motif: a joint experimental and theoretical study
Source: Royal Society of Chemistry journal article supplement (doi:10.1039/c8dt01084f), 2018-01-01
Supplement: c8dt01084f1.pdf [file c8dt01084f1.pdf]

## Electronic Supplementary Information

### No Aggregation-induced-emission but Quenching of Phosphorescence for an Iridium Complex with a 2,2-diphenylvinyl Motif: A Joint Experimental and Theoretical Study

*Mengzhen Chen,<sup>1,2</sup> Ying Lan<sup>2</sup>, Jiqing Zhen,<sup>3</sup> Fangfang Pan,<sup>1</sup> Xiangzhi Song,<sup>2</sup>*

*Lei He<sup>1\*</sup>*

<sup>1</sup> College of Chemistry, Key Laboratory of Pesticide & Chemical Biology of Ministry of Education, Hubei International Scientific and Technological Cooperation Base of Pesticide and Green Synthesis, Central China Normal University, Wuhan 430079, P. R. China.

<sup>2</sup> College of Chemistry and Chemical Engineering, Central South University, Changsha, Hunan 410083, P. R. China.

<sup>3</sup> Powder Metallurgy Research Institute, Central South University, Changsha, Hunan 410083, P. R. China.

*E-mail: helei@mail.ccnu.edu.cn*

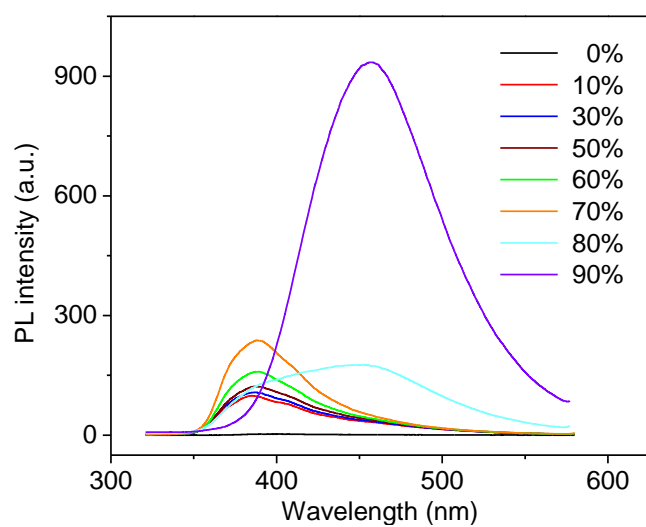

**Figure S1.** PL spectra of dpvppy in mixed THF/water (x%) solution ( $5 \times 10^{-5}$  M).

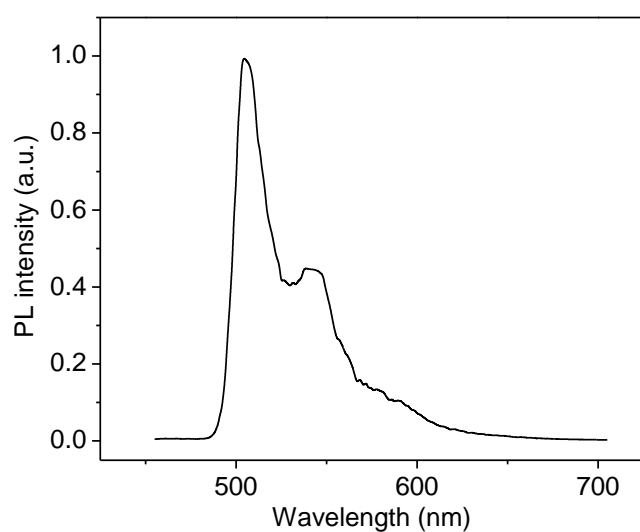

**Figure S2.** PL spectrum of complex 2 at 77 K in  $\text{CH}_2\text{Cl}_2$  glass.

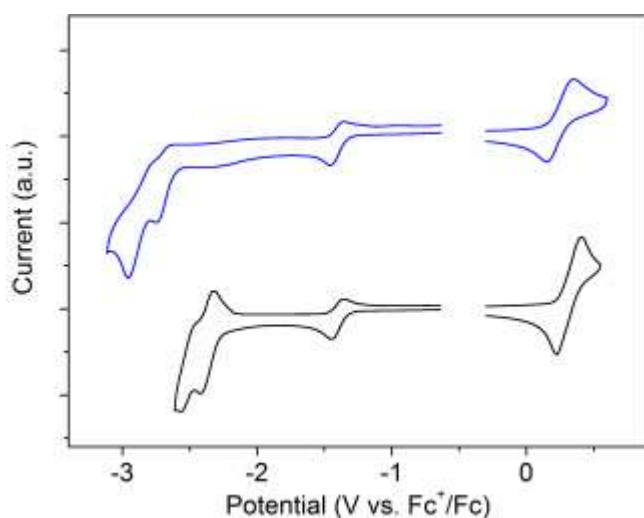

**Figure S3.** Cyclic voltammograms of complexes 1 and 2. The small peaks around  $-1.4$  V arise from some unknown impurities which also appear in the blank test.

**Table S1.** Geometrical parameters of optimized  $S_0$  and lowest triplet states of complexes 1 and 2. For comparison, the geometrical parameters of the single-crystal structure (Ex) for complex 1 were also shown.

| State | Bond lengths ( $\text{\AA}$ ) |        |        | Bite angles ( $^\circ$ ) |        | Dihedral angles ( $^\circ$ ) |              |            |
|-------|-------------------------------|--------|--------|--------------------------|--------|------------------------------|--------------|------------|
|       | Ir–C                          | Ir–N   | Ir–O   | C–Ir–N                   | O–Ir–O | $\Phi_1^a$                   | $\Phi_2^b$   | $\Phi_3^b$ |
| 1     | $S_0$                         | 2.005  | 2.063  | 2.205                    | 80.5   | 86.2                         | 27/ 27       | 58/ 40     |
|       |                               | /2.005 | /2.063 | /2.205                   | /80.5  |                              |              |            |
|       | $T_1$                         | 2.009  | 2.062  | 2.205                    | 80.6   | 86.3                         | 26/ <b>2</b> | 59/ 40     |
|       |                               | /2.006 | /2.063 | /2.203                   | /80.5  |                              |              |            |
|       | Ex <sup>c</sup>               | 2.011/ | 2.046/ | 2.152/                   | 80.5/  | 87.9                         | 20/ 37       | 65/ 32     |
|       |                               | 1.973  | 2.058  | 2.151                    | 80.2   |                              |              | 74/ 30     |
| 2     | $S_0$                         | 2.006  | 2.064  | 2.204                    | 80.5   | 86.2                         | –            | –          |
|       |                               | /2.006 | /2.064 | /2.204                   | /80.5  |                              |              |            |
|       | $T_1$                         | 1.979  | 2.067  | 2.217                    | 80.6   | 86.3                         | –            | –          |
|       |                               | /1.979 | /2.067 | /2.217                   | /80.5  |                              |              |            |

<sup>a</sup> Dihedral angle between the cyclometalated phenyl ring and the vinyl group. <sup>b</sup> Dihedral angle between the terminal phenyl ring and the vinyl group. <sup>c</sup> Single-crystal experimental data.

**Table S2.** Surface distributions of HOMO-3 to HOMO-1 and LUMO+1 to LUMO+3 for complexes 1 and 2.

**Complex 1**

| H-1                                                                                | H-2                                                                                | H-3                                                                                  |
|------------------------------------------------------------------------------------|------------------------------------------------------------------------------------|--------------------------------------------------------------------------------------|
| 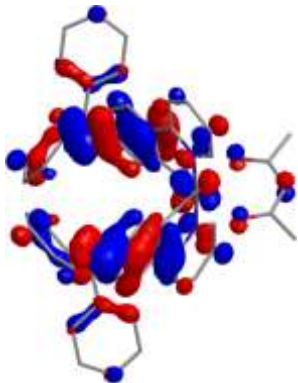  | 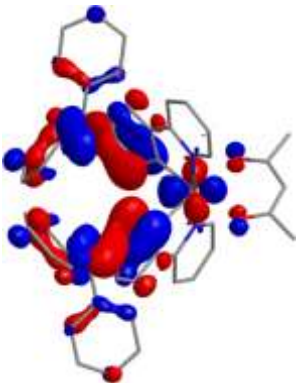  | 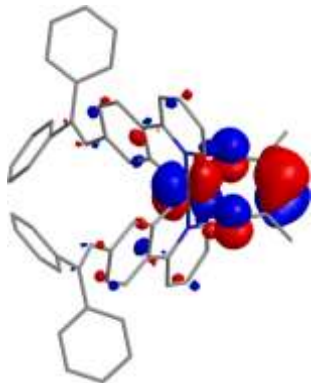  |
| L+1                                                                                | L+2                                                                                | L+3                                                                                  |
| 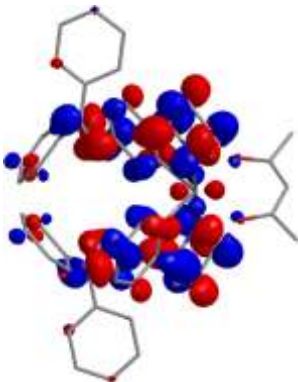 | 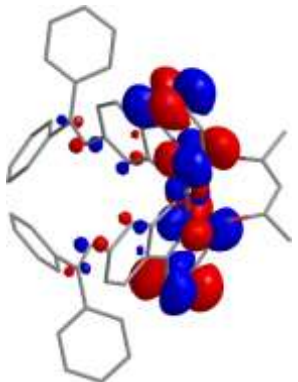 | 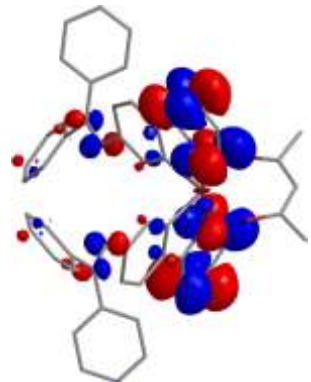 |

**Complex 2**

| H-1                                                                                 | H-2                                                                                 | H-3                                                                                   |
|-------------------------------------------------------------------------------------|-------------------------------------------------------------------------------------|---------------------------------------------------------------------------------------|
| 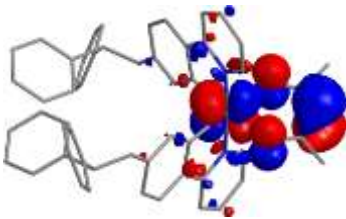 | 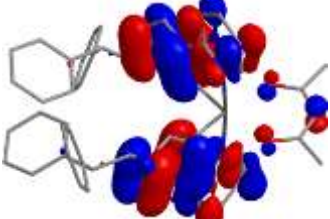 | 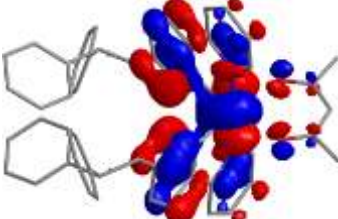 |
| L+1                                                                                 | L+2                                                                                 | L+3                                                                                   |
| 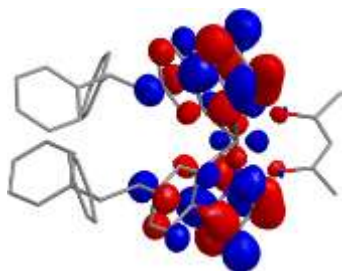 | 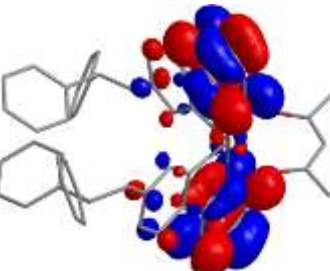 | 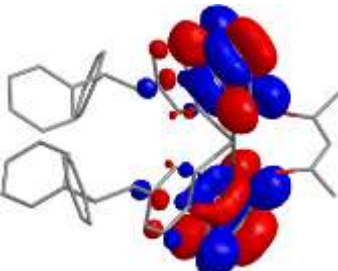 |

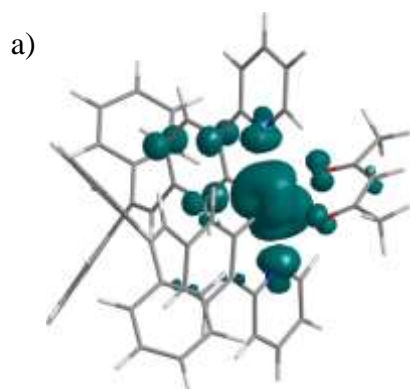

$$E_T = 2.85 \text{ eV}$$

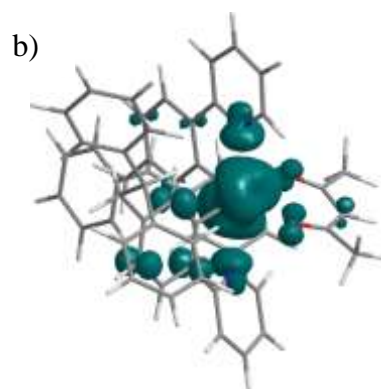

$$E_T = 2.79 \text{ eV}$$

**Figure S4.** Spin-density distribution of the  $^3\text{MC}$  state for a) complex 1 and b) complex 2.
